# Supplementary material
Source: publisher site journal article supplement (https://www.spandidos-publications.com/3388/downloadSupplementary)

Figure S1. Relative luciferase activity in VSMCs transfected with miR-103a mimics by the reporter plasmid with the 3'-UTR of Runx2 or with the mutant 3'-UTR of Runx2. WT, wild-type; Mut, Mutant; NC, negative control; miR, microRNA; VSMCs, vascular smooth muscle cells; Runx2, runt-related transcription factor 2.

miR-103a-3p 3' AGUAUCGGGACAUGUUACGACGA 5'  
 |||||  
 Luc-Runx2-WT 5'...TTTCTGCTTTCAGACATGCTGCA... 3'  
 Luc-Runx2-Mut 5'...TTTCTGCTTTCAGACCGTAGTAA... 3'

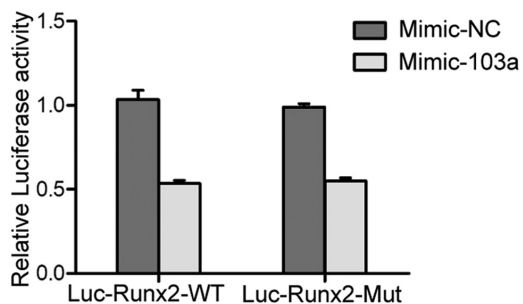

Supplement: Supplementary file 1 [file downloadSupplementary]
